# Supplementary material for: LSPR-Based Aptasensor for Rapid Urinary Detection of NT-proBNP
Source: MDPI journal article supplement (doi:10.3390/bios13070736), 2023-07-17
Supplement: s1 [file s1]

## **Supplementary Material**

### **LSPR-based Aptasensor for Rapid Urinary Detection of NT-proBNP**

**Maria António<sup>1</sup>, Rui Vitorino<sup>3,4,5,\*</sup> and Ana L. Daniel-da-Silva<sup>1,\*</sup>**

<sup>1</sup>CICECO-Aveiro Institute of Materials, Department of Chemistry, University of Aveiro, 3810-193 Aveiro, Portugal

<sup>2</sup>LAQV-REQUIMTE, Chemistry Department, University of Aveiro, 3810-193, Aveiro, Portugal

<sup>3</sup>iBiMED-Institute of Biomedicine, Department of Medical Sciences, University of Aveiro, Aveiro, 3810-193, Portugal

<sup>4</sup>UnIC@RISE, Department of Surgery and Physiology, Cardiovascular R&D Center, Faculty of Medicine of the University of Porto, Alameda Professor Hernâni Monteiro, 4200-319 Porto, Portugal

## **CONTENTS:**

|                                                                |           |
|----------------------------------------------------------------|-----------|
| <b>S1. Characterization of AuNPs.....</b>                      | <b>S3</b> |
| <b>S2. Detection of NT-proBNP using aptamer and AuNPs.....</b> | <b>S4</b> |
| <b>S3. Interaction of aptamer with NT-proBNP.....</b>          | <b>S5</b> |
| <b>S4. Effect of biofluids on NT-proBNP detection.....</b>     | <b>S6</b> |

### S.1. Characterization of AuNPs

**Table S1:** pH, Zeta potential, hydrodynamic diameter (HD) and PDI of AuNPs as synthesized.

| <b>pH</b> | <b>Zeta potential (mV)</b> | <b>HD (nm)</b> | <b>PDI</b> |
|-----------|----------------------------|----------------|------------|
| 5.7       | - 66.4±1.7                 | 21.6 ± 0.5     | 0.272      |

## S.2. Detection of NT-proBNP using aptamer and AuNPs

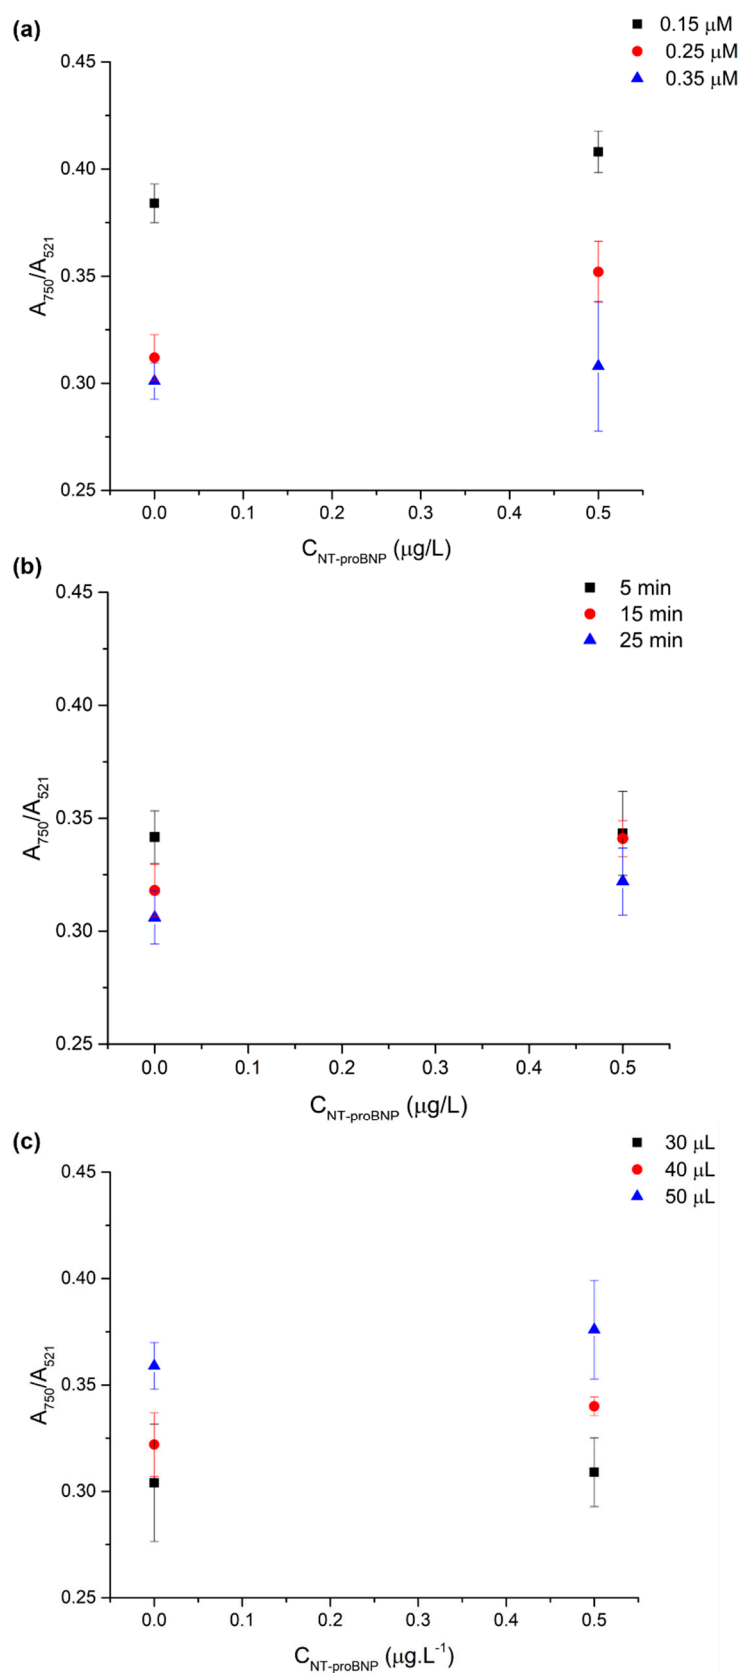

**Figure S1:** Effect of (a) concentration of aptamer, (b) time of incubation and (c) volume of NaCl in the  $A_{750}/A_{521}$  ratio in NT-proBNP detection.

### S.3. Interaction of aptamer with NT-proBNP

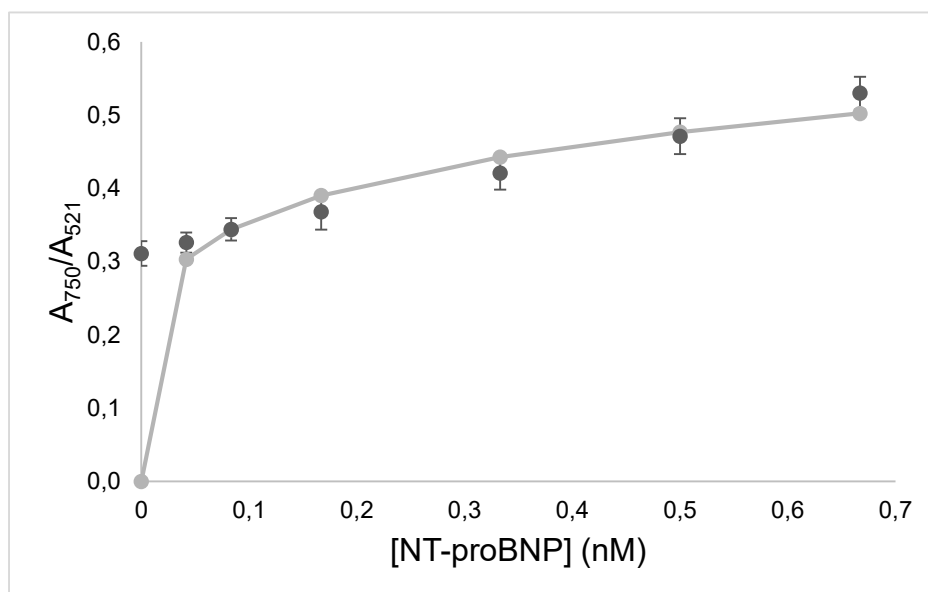

**Figure S2:** Fitting curve (solid line) of Hill equation for determining  $k_d$ .

$$Y = \frac{B_{max} \cdot X^n}{k_d^n + X^n} \quad (S1)$$

Equation S1 is the Hill equation where Y presents for the  $A_{750}/A_{521}$ , X is the initial concentration of NT-proBNP in nM,  $B_{max}$  is the maximum specific binding in nm, n is the Hill coefficient and  $k_d$  is the apparent dissociation constant.

#### S4. Effect of biofluids on NT-proBNP detection

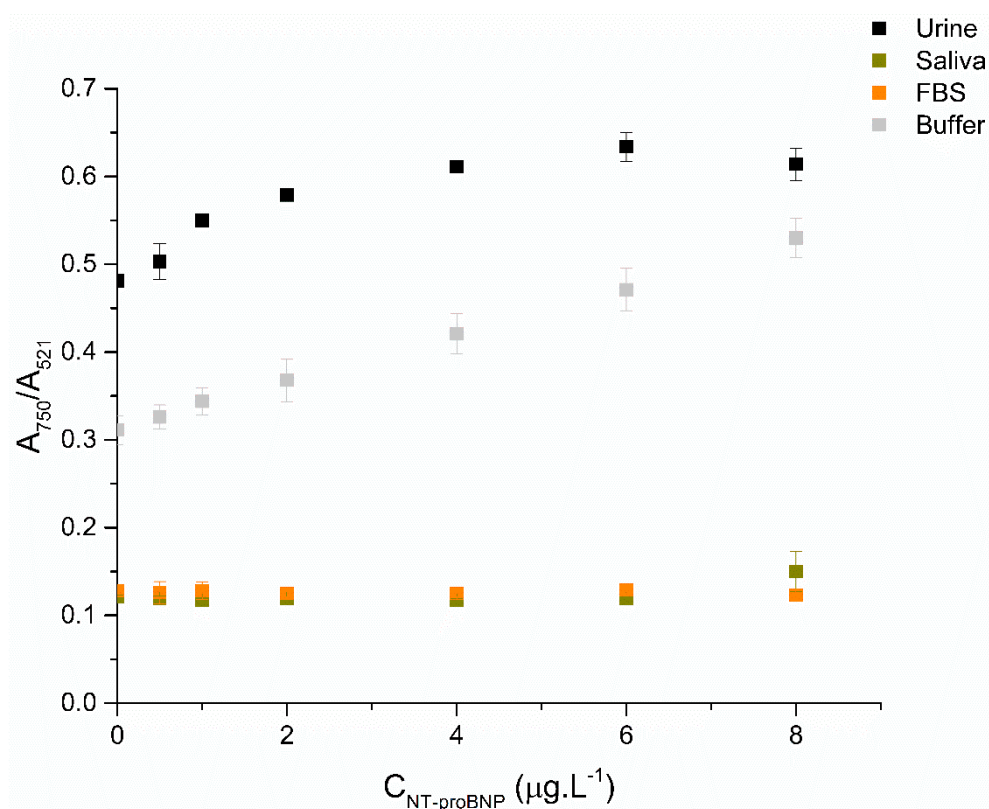

**Figure S3:** Plot of the aggregation ratio versus NT-proBNP concentration in spiked urine saliva and FBS.

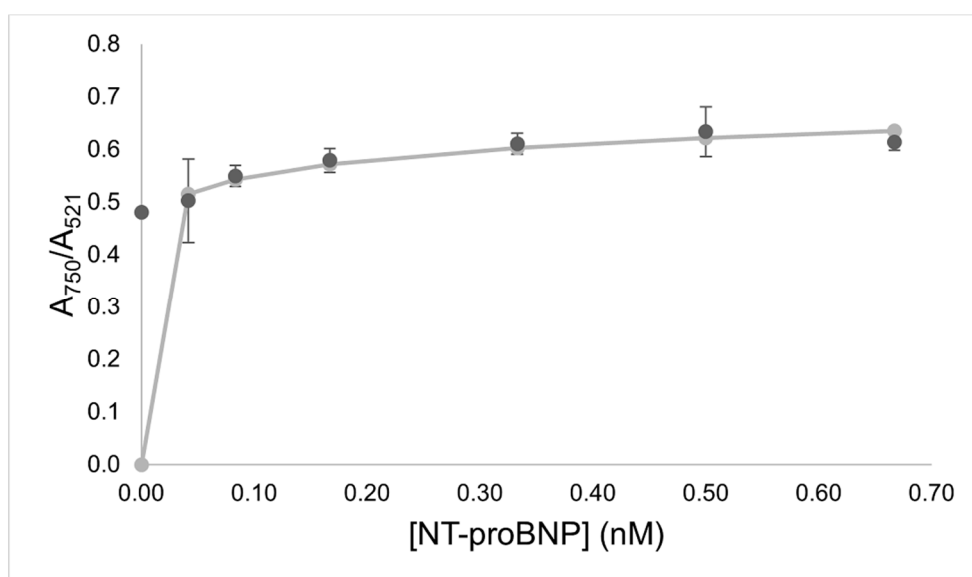

**Figure S4:** Curve fitting (solid line) of the Hill equation to determine the dissociation constant ( $k_d$ ) for the interaction between Apt and NT-proBNP in urine.
